# Supplementary material for: Shape of attachment structures in parasitic isopodan crustaceans: the influence of attachment site and ontogeny
Source: PeerJ journal article supplement (doi:10.7717/peerj.9181), 2020-06-18

-2S.D.

Mean

+2S.D.

PC1

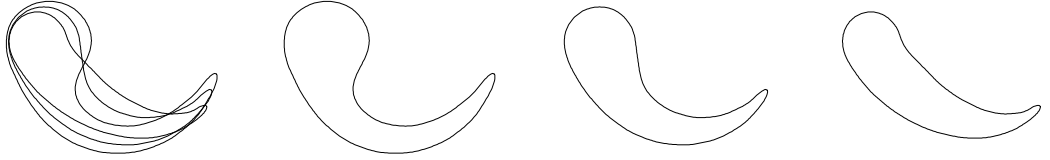

PC2

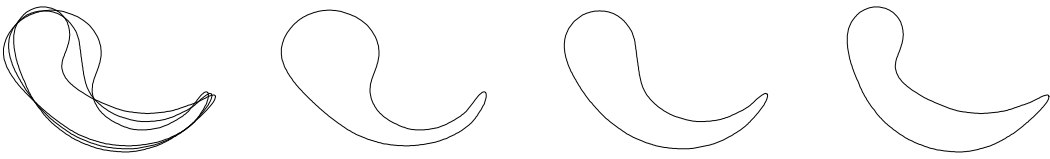

PC3

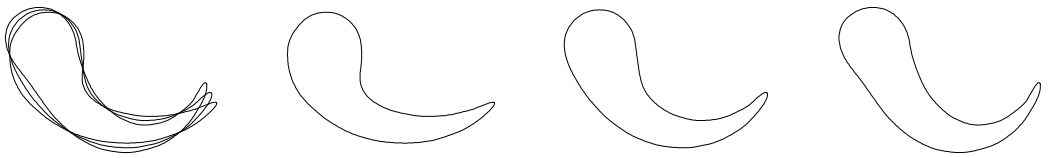

PC4

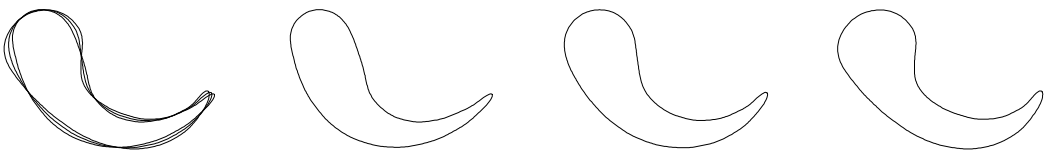

PC5

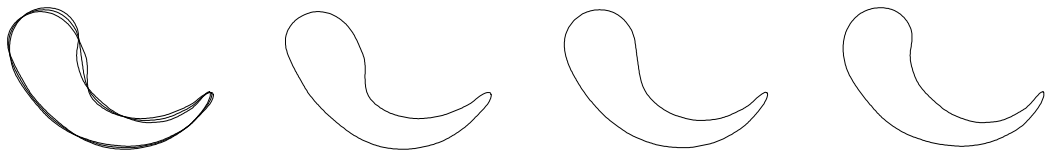

Supplement: Supplement_Figure_S5.pdf [file Supplement_Figure_S5.pdf]
