# Supplementary material for: Shape of attachment structures in parasitic isopodan crustaceans: the influence of attachment site and ontogeny
Source: PeerJ journal article supplement (doi:10.7717/peerj.9181), 2020-06-18

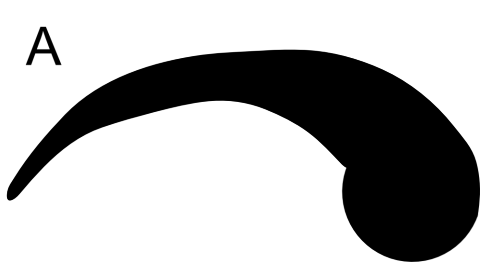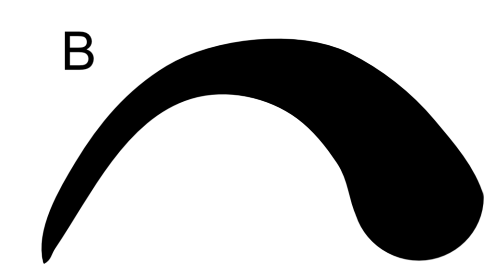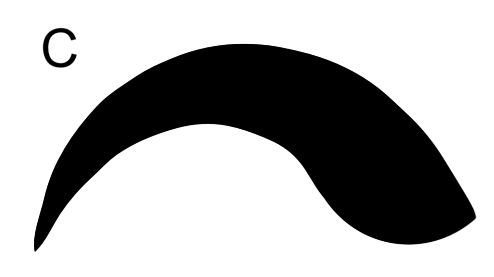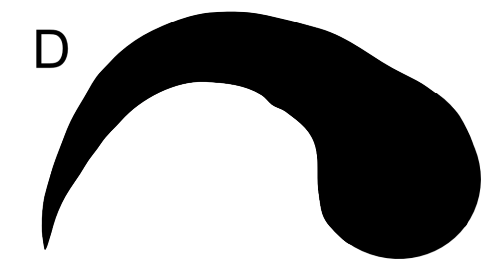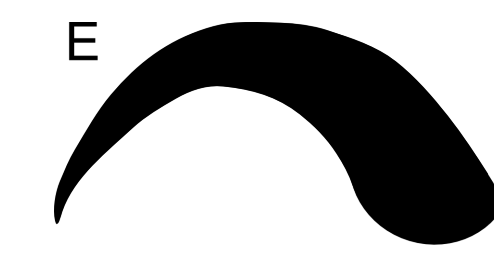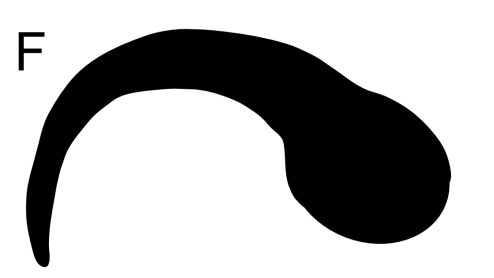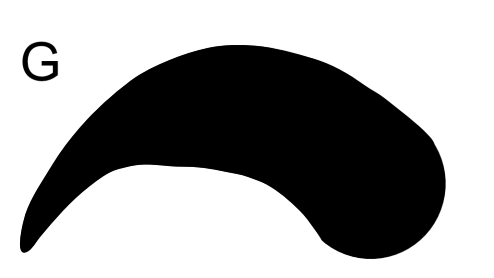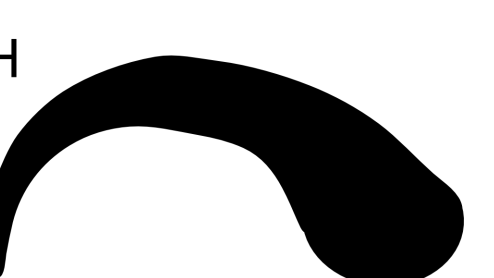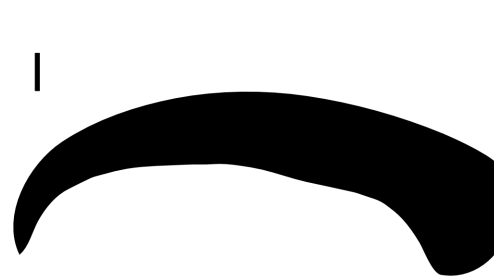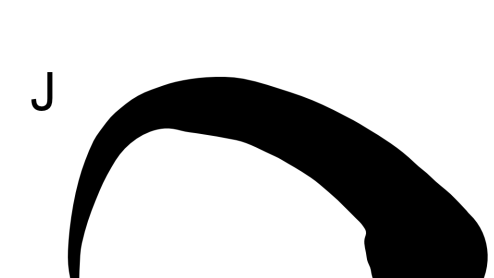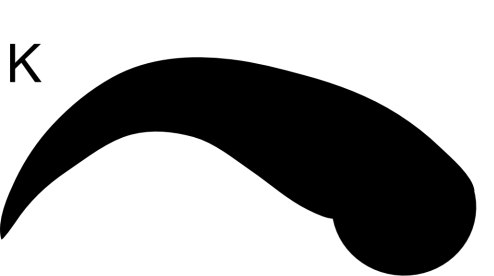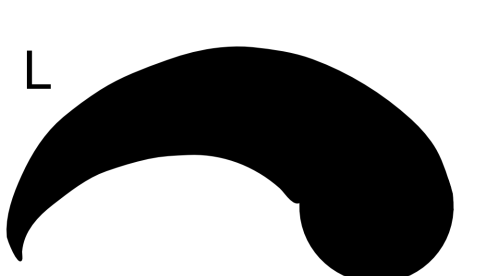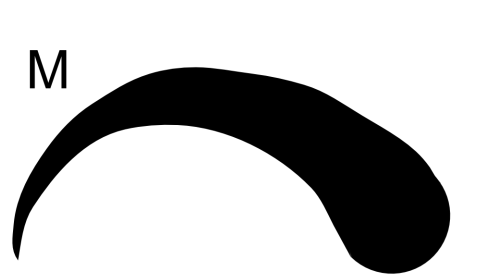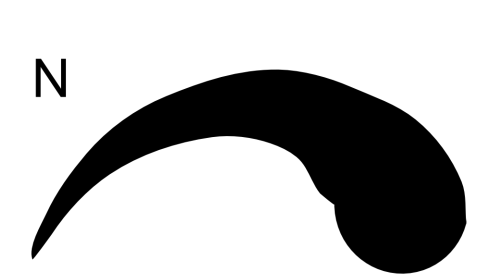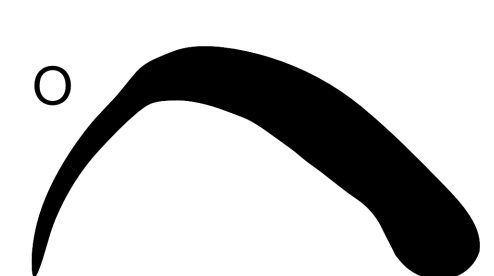

Supplement: Supplemental_Figure_S1.pdf [file Supplemental_Figure_S1.pdf]
