# Supplementary material for: Shape of attachment structures in parasitic isopodan crustaceans: the influence of attachment site and ontogeny
Source: PeerJ journal article supplement (doi:10.7717/peerj.9181), 2020-06-18

A

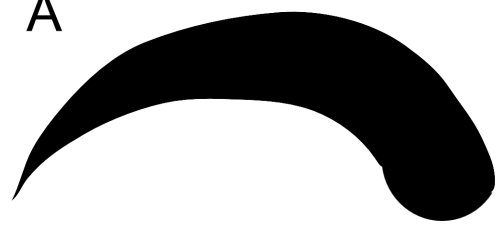

B

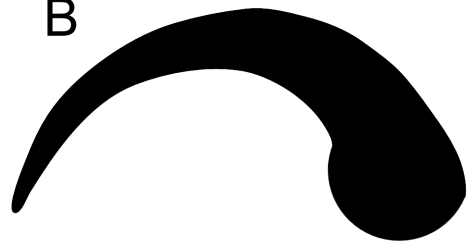

C

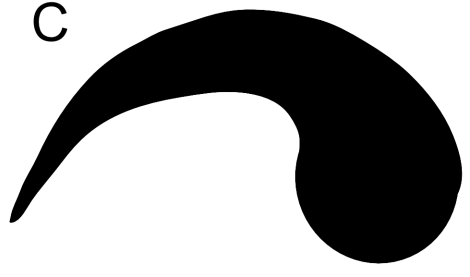

D

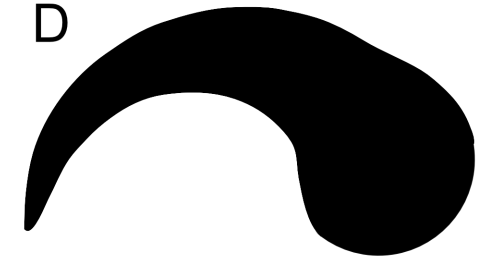

E

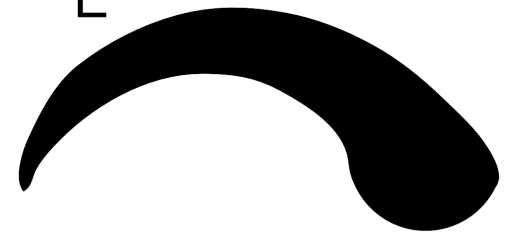

F

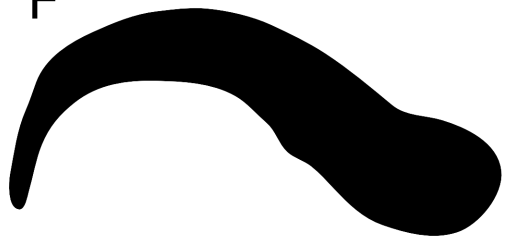

G

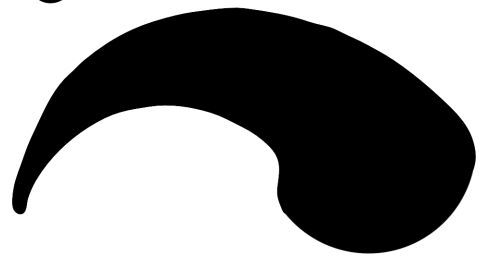

H

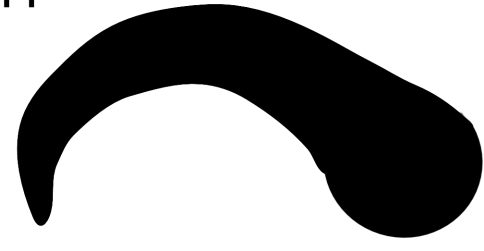

I

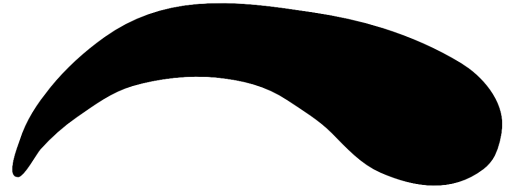

J

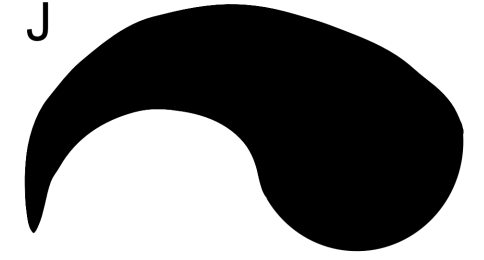

K

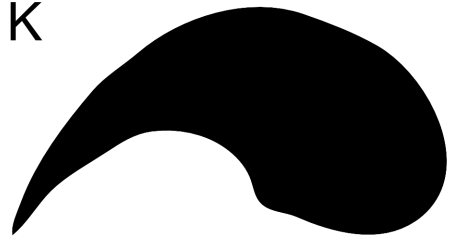

L

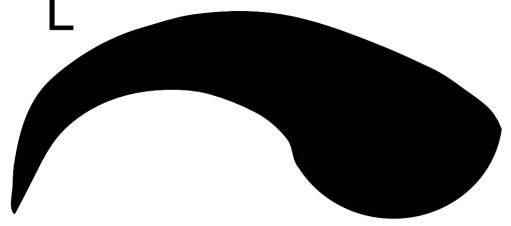

M

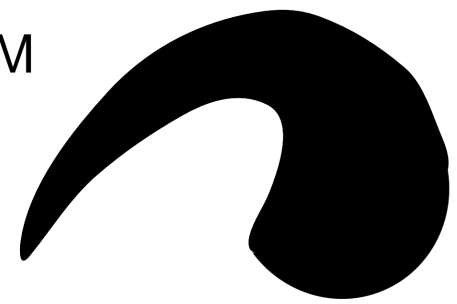

N

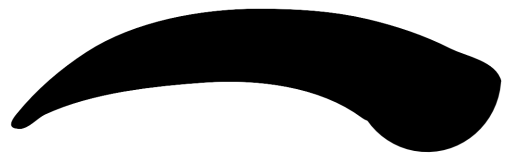

O

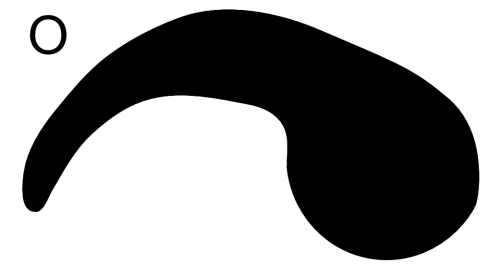

Supplement: Supplemental_Figure_S4.pdf [file Supplemental_Figure_S4.pdf]
